# Supplementary material
Source: HighWire-hosted journal article supplement (doi:10.1101/rna.080405.125)
Supplement: Supplemental_Table_S1_.xlsx [file Supplemental_Table_S1_.xlsx]

## Sheet: DNA oligos
Name	Sequence 5' -> 3'	Purpose
CDC8 WT Forward	GCCTAATACGACTCACTATAGTCAATCACGATTGTAGACGTTACTAATAAGGGCATTCAGGAAGTTGAAGCG	For in vitro transcription
CDC8 WT Reverse	CCAAATAAGCGCTTCAACTTCCTGAATGCCCTTATTAGTAACG	For in vitro transcription
CDC8 U13C Forward	GCCTAATACGACTCACTATAGTCAATCACGATCGTAGACGTTACTAATAAGGGCATTCAGGAAGTTGAAGCG	For in vitro transcription
CDC8 U13C Reverse	CCAAATAAGCGCTTCAACTTCCTGAATGCCCTTATTAGTAACG	For in vitro transcription
CDC8 U13A Forward	GCCTAATACGACTCACTATAGTCAATCACGATAGTAGACGTTACTAATAAGGGCATTCAGGAAGTTGAAGCG	For in vitro transcription
CDC8 U13A Reverse	CCAAATAAGCGCTTCAACTTCCTGAATGCCCTTATTAGTAACG	For in vitro transcription
CDC8 G14C Forward	GCCTAATACGACTCACTATAGTCAATCACGATTCTAGACGTTACTAATAAGGGCATTCAGGAAGTTGAAGCG	For in vitro transcription
CDC8 G14C Reverse	CCAAATAAGCGCTTCAACTTCCTGAATGCCCTTATTAGTAACG	For in vitro transcription
CDC8 G14A Forward	GCCTAATACGACTCACTATAGTCAATCACGATTATAGACGTTACTAATAAGGGCATTCAGGAAGTTGAAGCG	For in vitro transcription
CDC8 G14A Reverse	CCAAATAAGCGCTTCAACTTCCTGAATGCCCTTATTAGTAACG	For in vitro transcription
CDC8 G14U Forward	GCCTAATACGACTCACTATAGTCAATCACGATTTTAGACGTTACTAATAAGGGCATTCAGGAAGTTGAAGCG	For in vitro transcription
CDC8 G14U Reverse	CCAAATAAGCGCTTCAACTTCCTGAATGCCCTTATTAGTAACG	For in vitro transcription
CDC8 U15C Forward	GCCTAATACGACTCACTATAGTCAATCACGATTGCAGACGTTACTAATAAGGGCATTCAGGAAGTTGAAGCG	For in vitro transcription
CDC8 U15C Reverse	CCAAATAAGCGCTTCAACTTCCTGAATGCCCTTATTAGTAACG	For in vitro transcription
CDC8 A16G Forward	GCCTAATACGACTCACTATAGTCAATCACGATTGTGGACGTTACTAATAAGGGCATTCAGGAAGTTGAAGCG	For in vitro transcription
CDC8 A16G Reverse	CCAAATAAGCGCTTCAACTTCCTGAATGCCCTTATTAGTAACG	For in vitro transcription
CDC8 A16C Forward	GCCTAATACGACTCACTATAGTCAATCACGATTGTCGACGTTACTAATAAGGGCATTCAGGAAGTTGAAGCG	For in vitro transcription
CDC8 A16C Reverse	CCAAATAAGCGCTTCAACTTCCTGAATGCCCTTATTAGTAACG	For in vitro transcription
CDC8 G17C Forward	GCCTAATACGACTCACTATAGTCAATCACGATTGTACACGTTACTAATAAGGGCATTCAGGAAGTTGAAGCG	For in vitro transcription
CDC8 G17C Reverse	CCAAATAAGCGCTTCAACTTCCTGAATGCCCTTATTAGTAACG	For in vitro transcription
CDC8 G17A Forward	GCCTAATACGACTCACTATAGTCAATCACGATTGTAAACGTTACTAATAAGGGCATTCAGGAAGTTGAAGCG	For in vitro transcription
CDC8 G17A Reverse	CCAAATAAGCGCTTCAACTTCCTGAATGCCCTTATTAGTAACG	For in vitro transcription
CDC8 U12C Forward	GCCTAATACGACTCACTATAGTCAATCACGACTGTAGACGTTACTAATAAGGGCATTCAGGAAGTTGAAGCG	For in vitro transcription
CDC8 U12C Reverse	CCAAATAAGCGCTTCAACTTCCTGAATGCCCTTATTAGTAACG	For in vitro transcription
T. thermophilus tRNAAsp_GUC-1-1 Forward	GCCTAATACGACTCACTATAGGCCCCGTGGTGTAGTTGGTTAACACACCCGCCTGTCACGTGGGAGATCGCGGGTTCGAGTCCCGTCGGGGCCGCC	For in vitro transcription
T. thermophilus tRNAAsp_GUC-1-1 Reverse	TGGCGGCCCCGACGGGACTCGAACCC	For in vitro transcription
T. thermophilus tRNAAsp_GUC_U13C Forward	GCCTAATACGACTCACTATAGGCCCCGTGGTGCAGTTGGTTAACACACCCGCCTGTCACGTGGGAGATCGCGGGTTCGAGTCCCGTCGGGGCCGCC	For in vitro transcription
T. thermophilus tRNAAsp_GUC_U13C Reverse	TGGCGGCCCCGACGGGACTCGAACCC	For in vitro transcription
T. thermophilus tRNAAsp_GUC_U11A Forward	GCCTAATACGACTCACTATAGGCCCCGTGGAGTAGTTGGTTAACACACCCGCCTGTCACGTGGGAGATCGCGGGTTCGAGTCCCGTCGGGGCCGCC	For in vitro transcription
T. thermophilus tRNAAsp_GUC_U11A Reverse	TGGCGGCCCCGACGGGACTCGAACCC	For in vitro transcription
T. thermophilus tRNAAsp_GUC_G12C Forward	GCCTAATACGACTCACTATAGGCCCCGTGGTCTAGTTGGTTAACACACCCGCCTGTCACGTGGGAGATCGCGGGTTCGAGTCCCGTCGGGGCCGCC	For in vitro transcription
T. thermophilus tRNAAsp_GUC_G12C Reverse	TGGCGGCCCCGACGGGACTCGAACCC	For in vitro transcription
T. thermophilus tRNAAsp_GUC_A14G Forward	GCCTAATACGACTCACTATAGGCCCCGTGGTGTGGTTGGTTAACACACCCGCCTGTCACGTGGGAGATCGCGGGTTCGAGTCCCGTCGGGGCCGCC	For in vitro transcription
T. thermophilus tRNAAsp_GUC_A14G Reverse	TGGCGGCCCCGACGGGACTCGAACCC	For in vitro transcription
T. thermophilus tRNAAsp_GUC_G15C Forward	GCCTAATACGACTCACTATAGGCCCCGTGGTGTACTTGGTTAACACACCCGCCTGTCACGTGGGAGATCGCGGGTTCGAGTCCCGTCGGGGCCGCC	For in vitro transcription
T. thermophilus tRNAAsp_GUC_G15C Reverse	TGGCGGCCCCGACGGGACTCGAACCC	For in vitro transcription
T. thermophilus tRNATyr_GUA-1-1 Forward	GCCTAATACGACTCACTATAGGGCAGGTGCCCGAGCGGCCAAAGGGGACGG	For in vitro transcription
T. thermophilus tRNATyr_GUA-1-1 Reverse	TGGTGGGCAGGGCTGGATTCGAACCAGCGAAGGCATACGCCAACGGTTTTACAGACCGTCCCCTTTGGCCGCTCGGGCAC	For in vitro transcription
T. thermophilus tRNATyr_GUA_U35C Forward	GCCTAATACGACTCACTATAGGGCAGGTGCCCGAGCGGCCAAAGGGG	For in vitro transcription
T. thermophilus tRNATyr_GUA_U35C Reverse	TGGTGGGCAGGGCTGGATTCGAACCAGCGAAGGCATACGCCAACGGTTTTGCAGACCGTCCCCTTTGGCCGCTCGGGCACCTG	For in vitro transcription
T. thermophilus tRNAGln_CUG Forward	GCCTAATACGACTCACTATATGGGGTGTCGTCTAAGGGTAGGACAGCGGACTCTG	For in vitro transcription
T. thermophilus tRNAGln_CUG Reverse	TGGCTGGGGTGCGTGGATTCGAACCACGACCGGCGGATCCAGAGTCCGCTGTCCTACCCTTAGACGACAC	For in vitro transcription
T. thermophilus tRNAGlu_CUC Forward	GCCTAATACGACTCACTATAGGCCCCATCGTCTAGAGGCCTAGGACACGGCCCTCTCAAGGCCGAGACGGGGGTTCGAATCCCCCTGGGGTCAC	For in vitro transcription
T. thermophilus tRNAGlu_CUC Reverse	TGGTGACCCCAGGGGGATTCGAACCCCCG	For in vitro transcription
T. thermophilus tRNAGlu_UUC Forward	GCCTAATACGACTCACTATAGGCCCCATCGACTAGCGGTTAGGTCACCGGCCTTTCAAGCCGGCGGCGGG	For in vitro transcription
T. thermophilus tRNAGlu_UUC Reverse	TGGTGACCCCAGGGGGACTCGAACCCCCGCCGCCGGCTTGAAAGGCCG	For in vitro transcription
T. thermophilus tRNAGlu_UUC A11U Forward	GCCTAATACGACTCACTATAGGCCCCATCGTCTAGCGGTTAGGTCACCGGCCTTTCAAGCCGGCGGCGGG	For in vitro transcription
T. thermophilus tRNAGlu_UUC A11U Reverse	TGGTGACCCCAGGGGGACTCGAACCCCCGCCGCCGGCTTGAAAGGCCG	For in vitro transcription
T. thermophilus tRNAGlu_UUC A11C Forward	GCCTAATACGACTCACTATAGGCCCCATCGCCTAGCGGTTAGGTCACCGGCCTTTCAAGCCGGCGGCGG	For in vitro transcription
T. thermophilus tRNAGlu_UUC A11C Reverse	TGGTGACCCCAGGGGGACTCGAACCCCCGCCGCCGGCTTGAAAGGCCGG	For in vitro transcription
E. coli tRNAGlu_UUC Forward	GCCTAATACGACTCACTATAGTCCCCTTCGTCTAGAGGCCCAGGACACCGCCCTTTCACGGC	For in vitro transcription
E. coli tRNAGlu_UUC Reverse	TGGCGTCCCCTAGGGGATTCGAACCCCTGTTACCGCCGTGAAAGGGCGGTGTCCTGGGCC	For in vitro transcription
RNA337 Forward	GCCTAATACGACTCACTATAGCCTCCGCCGCCTCTACCAGGGGCGGACCCTGGCCGAG	For in vitro transcription
RNA337 Reverse	CTCCGCGAAGAGGCGCACAAGCCCCTCCGCCCCCTCCAGAGGCCTAAACGCCTCGGCCAGGGTCCGCCCCTGGTAG	For in vitro transcription
RNA337 U43C Forward	GCCTAATACGACTCACTATAGCCTCCGCCGCCTCTACCAGGGGCGGACCCTGGCCGAGGC	For in vitro transcription
RNA337 U43C Reverse	CTCCGCGAAGAGGCGCACAAGCCCCTCCGCCCCCTCCAGAGGCCTGAACGCCTCGGCCAGGGTCCGCCCCTG	For in vitro transcription
RNA363 Forward	GCCTAATACGACTCACTATAGCCCCCGGATCCTGGGGGAGGGGAG	For in vitro transcription
RNA363 Reverse	GCGGGCAAGGCGAAGGCGGAGGGCCTCCGCCACCCGCTCCACCCTAAAGCCCTCGGCAAGCCCCCTCCCCTCCCCCAGGATCCGGGGG	For in vitro transcription
RNA363 U43C Forward	GCCTAATACGACTCACTATAGCCCCCGGATCCTGGGGGAGGGGAG	For in vitro transcription
RNA363 U43C Reverse	GCGGGCAAGGCGAAGGCGGAGGGCCTCCGCCACCCGCTCCACCCTGAAGCCCTCGGCAAGCCCCCTCCCCTCCCCCAGGATCCGGGGG	For in vitro transcription
RNA428 Forward	GCCTAATACGACTCACTATAGCCGGACGATTTACATCTACTTCAACACCCAACGCCC	For in vitro transcription
RNA428 Reverse	CTTGTTGACCGCATGGTTGAAGGCTTGCCTTACCCGGACGTCGTTAAAGGGCGGGCGTTGGGTGTTGAAGTAGATGTAAATCGTCC	For in vitro transcription
RNA428 U43C Forward	GCCTAATACGACTCACTATAGCCGGACGATTTACATCTACTTCAACACCCAACGCCC	For in vitro transcription
RNA428 U43C Reverse	CTTGTTGACCGCATGGTTGAAGGCTTGCCTTACCCGGACGTCGTTGAAGGGCGGGCGTTGGGTGTTGAAGTAGATGTAAATCGTCC	For in vitro transcription
RNA499 Forward	GCCTAATACGACTCACTATAGTCATCTTCCGAGAAAGCTACGTAAAGGACTTGGAAAACTTTTTAAAGCAAAACGCCACTACATTGTCCGGAC	For in vitro transcription
RNA499 Reverse	TTATCCCAGGGTATGAGTCCGGACAATGTAGTGGCGTTTTGCTTTAAAAAG	For in vitro transcription
RNA499 U43C Forward	GCCTAATACGACTCACTATAGTCATCTTCCGAGAAAGCTACGTAAAGGACTTGGAAAACTTTTCAAAGCAAAACGCCACTACATTGTCCGG	For in vitro transcription
RNA499 U43C Reverse	TTATCCCAGGGTATGAGTCCGGACAATGTAGTGGCGTTTTGCTTTGAAAAG	For in vitro transcription
RT primer for tRNAAsp	GTGACAGGCGGGTGTGTTAACC	For primer extension
RT primer for tRNATyr	CGAAGGCATACGCCAACGG	For primer extension
truD gene-specific probe for dot hybridization	AAGGCCCACTTGTCCAGGTGC	Dot hybridization
